# Supplementary material for: Transcription Factor Binding Site in Promoter Determines the Pattern of Plasmid-Based Transgene Expression In Vivo
Source: MDPI journal article supplement (doi:10.3390/pharmaceutics16040544), 2024-04-15
Supplement: s1 [file s1]

Table S1. Primer sets used in PCR-based amplification

| Name                                                                                                           | Forward sequence                                        | Reverse sequence                      |
|----------------------------------------------------------------------------------------------------------------|---------------------------------------------------------|---------------------------------------|
| <i>1. Amplification of selected region of CMV promoter</i>                                                     |                                                         |                                       |
| -463 > +1                                                                                                      | 5'-GGAAGATCTTTGACGTCAATAATGACGTAT-3'                    | 5'-ACGGGGTACCTCACTCTTGGCACGGGGAAT-3'  |
| -193 > +1                                                                                                      | 5'-GGAAGATCTAATGGG CGTGGATAGCGGTT-3'                    | 5'-ACGGGGTACCTCACTCTTGGCACGGGGAAT-3'  |
| -103 > +1                                                                                                      | 5'-GGAAGATCTCGGGACTTTCCAAAATGTCGT-3'                    | 5'-ACGGGGTACCTCACTCTTGGCACGGGGAAT-3'  |
| -93 > +1 (NoTFBS)                                                                                              | 5'-GGAAGATCTCAAAATGTCGTAACAACCTCC-3'                    | 5'-ACGGGGTACCTCACTCTTGGCACGGGGAAT-3'  |
| <i>2. Amplification of DNA fragment with one transcription factor binding site of Alb promoter<sup>a</sup></i> |                                                         |                                       |
| HNF4α                                                                                                          | 5'-GGAAGATCTAGGTCAAAGTCCAGCAAAATGTCGTAACAACCTCC-3'      | 5'-ACGGGGTACCTCACTCTTGGCACGGGGAAT-3'  |
| CEBPA                                                                                                          | 5'-GGAAGATCTGCATTGCACAATGCCAAAATGTCGTAACAACCTCC-3'      | 5'-ACGGGGTACCTCACTCTTGGCACGGGGAAT-3'  |
| HNF1                                                                                                           | 5'-GGAAGATCT TGGTTAATAATCTACAG CAAAATGTCGTAACAACCTCC-3' | 5'-ACGGGGTACCTCACTCTTGGCACGGGGAAT-3'  |
| <i>3. Quantification of DNA sequences resulted from ChIP</i>                                                   |                                                         |                                       |
| Promoter Region:                                                                                               | 5'-GGAAGATCTCGGGACTTTCCAAAATGTCGT-3'                    | 5'-GGTACCGGTTCACTAAA CGAGCTCTGCTTA-3' |
| SEAP Region:                                                                                                   | 5'-CTCCAACATGGACGCATTGACG-3'                            | 5'-CCCATGCGAAACATGTACTTT-3'           |
| GAPDH Promoter:                                                                                                | 5'-CTGCAGTACTGTGGGGAGGT-3'                              | 5'-CAAAGGCGGAGTTACCAGAG-3'            |
| <i>4. Detection of mRNA level of transcription factor in the liver of hydrodynamically injected mouse</i>      |                                                         |                                       |
| NFκBp65                                                                                                        | 5'-AGGCTTCTGGGCCTTATGTG-3'                              | 5'-TGCTTCTCTCGCCAGGAATAC-3'           |
| ATF1                                                                                                           | 5'-GATTCCCACAAGAGTAACACGAC-3'                           | 5'-CCTATGCTGTCAGATGAGTCCT-3'          |
| AP1                                                                                                            | 5'-CCTTCTACGACGATGCCCTC-3'                              | 5'-GGTTCAAGGTCATGCTCTGTTT-3'          |
| SP1                                                                                                            | 5'-GCCGCCTTTTCTCAGACTC-3'                               | 5'-TTGGGTGACTCAATTCTGCTG-3'           |
| SRF                                                                                                            | 5'-GGCCGCGTGAAGATCAAGAT-3'                              | 5'-CACATGGCCTGTCTCACTGG-3'            |
| FOXA1                                                                                                          | 5'-ATGAGAGCAACGACTGGAACA-3'                             | 5'-TCATGGAGTTCATAGAGCCCA-3'           |
| NF1α                                                                                                           | 5'-GCAGCCAGTCCAGTGGATG-3'                               | 5'-TGCTCTGGGTCCTGTAATGAC-3'           |
| HNF4α                                                                                                          | 5'-GTGGCGAGTCCTTATGACACG-3'                             | 5'-GCTGTTGGATGAATTGAGGTTGG-3'         |
| CEBPA                                                                                                          | 5'-CAAGAACAGCAACGAGTACCG-3'                             | 5'-GTCAGTGGTCAACTCCAGCAC-3'           |
| HNF1                                                                                                           | 5'-GACCTGACCGAGTTGCCTAAT-3'                             | 5'-CCGGCTCTTTCAGAATGGGT-3'            |
| GAPDH                                                                                                          | 5'-AGGTCGGTGTGAACGGATTG-3'                              | 5'-TGTAGACCATGTAGTTGAGGTCA-3'         |

<sup>a</sup>The underlined sequences are the consensus sequences for the listed transcription factors. HNF4α: hepatocyte nuclear factor 4α; CEBPA: CCAAT/enhancer-binding protein α; HNF1: hepatocyte nuclear factor 1 homeobox A.
